1 **The TMJ disc is a common ancestral feature in all mammals, as**  
2 **evidenced by the presence of a rudimentary disc during**  
3 **monotreme development**

4

5

6 Neal Anthwal, Abigail S Tucker.

7

8 Centre for Craniofacial and Regenerative Biology, 27<sup>th</sup> Floor Guy's Tower, King's College

9 London, London SE1 9RT

10

11

12 **Abstract**

13 The novel mammalian jaw joint, known in humans as the temporomandibular joint or TMJ, is  
14 cushioned by a fibrocartilage disc. This disc is secondarily absent in therian mammals that  
15 have lost their dentition, such as giant anteaters and some baleen whales. The disc is also  
16 absent in all monotremes. However, it is not known if the absence in monotremes is  
17 secondary to the loss of dentition, or if it is an ancestral absence. We use museum held  
18 platypus and echidna histological sections to demonstrate that the developing monotreme jaw  
19 joint forms a disc primordium that fails to mature and become separated from the mandibular  
20 condyle. We then show that monotreme developmental anatomy is similar to that observed in  
21 transgenic mouse mutants with reduced musculature. We therefore suggest that the absence of  
22 the disc on monotremes is a consequence of the changes in jaw musculature associated with  
23 the loss of adult teeth. Taken together, these data indicate that the ancestors of extant  
24 monotremes likely had a jaw joint disc, and that the disc evolved in the last common ancestor  
25 or all mammals.

26

27 **Keywords**

28 TMJ disc, monotreme, mammalian evolution, jaw joint, evo devo

29

30

31

## 32 **Introduction**

33 The temporomandibular joint (TMJ) is the one of the most used joints in the body,  
34 articulating the upper and lower jaw in mammals. A fibrous articular disc sits between the  
35 skeletal elements of the joint and acts as a cushion.

36

37 TMJ development occurs by the coming together of two membranous bones: the condylar  
38 process of the dentary bone in the mandible and the squamosal bone in the skull. The  
39 interaction of the condylar with the squamosal induces the formation of a glenoid (or  
40 mandibular) fossa on the latter [1]. The articular disc sits between the two within a synovial  
41 capsule. The TMJ disc attaches to the superior head of the lateral pterygoid muscle anteriorly,  
42 and to ligaments posteriorly including the disco-malleolar ligament that runs through the  
43 capsule of the middle ear, joining the malleus to the TMJ disc. The TMJ articulates the jaw in  
44 all mammals, and is referred to as the squamosal dentary joint (SDJ) in those mammals  
45 without a fused temporal bone. In non-mammals the upper and lower jaw articulate via the  
46 endochondral quadrate and articular, known as the primary jaw joint [2]. TMJ developmental  
47 anatomy reflects its evolutionary history as this novel, jaw joint forms after the development  
48 of the primary joint, which, in mammals, is integrated into the middle ear [3–6]. In recent  
49 years, a number of studies have advanced the understanding of middle ear evolution in the  
50 context of anatomical development [3,7–10], but little work has sought to understand the TMJ  
51 in an evolutionary and comparative developmental biology context. This is despite the crucial  
52 role that the formation of the TMJ has in mammalian evolution.

53 An important part of the TMJ is the disc that cushions its action. The origin of the disc is  
54 uncertain. The insertion of the lateral pterygoid muscle into the disc on the medial aspect, and  
55 the presence of the discomalleolar ligament has led to speculation that the disc represents a  
56 fibrocartilage sesamoid with a tendon of a muscle of mastication trapped by the novel  
57 mammalian jaw joint [11]. However, studies in mice indicate that the disc develops from a  
58 region of flattened mesenchyme cells adjacent to, or possibly part of, the perichondrium of the  
59 developing condylar cartilage [12–14]. Formation of the disc condensation is dependent on  
60 *Ihh* signalling from the cartilage [12,15,16], and *Fgf* signalling via *Spry 1* and *2* genes from  
61 the adjacent muscles [13]. Therefore, the disc may have its origins in either a tendon, the  
62 novel secondary cartilage of the condylar process, or a combination of the two.

63

64 Interestingly the disc is absent in extant monotremes [17]. Monotremes and therian mammals  
65 (marsupials and placentals) are evolutionary distant, with the common ancestor of the two  
66 subclasses being a mammal like reptile form around 160 million years ago [18]. Monotremes  
67 have a number of “reptile” like anatomical features such as a cloaca, external embryonic  
68 development in an egg, a straight cochlear in the inner ear and laterally protruding legs [19].  
69 The absence of a disc in both echidna and platypus suggests that the disc evolved after the  
70 split between monotremes and therian mammals, and is therefore a therian novelty.  
71 Alternatively, absence of the TMJ disc in extant monotremes might be due to a secondary loss  
72 of this structure, linked to changes in mastication with the reduction and loss of teeth. Extant  
73 adult monotremes are edentulous, possibly due to the evolution of electroreceptivity [20]. The  
74 juvenile platypus has rudimentary teeth that regress [21], while the echidna shows only  
75 thickening of the dental epithelium during development. In contrast, fossil monotremes have a  
76 mammalian tribosphenic dentition and were capable of chewing [18]. The presence or  
77 absence of a disc in such fossils is difficult to ascertain due to lack of preservation of soft  
78 tissue. In support of mastication playing a role in disc formation edentulous therian mammals,  
79 or those lacking enamel, often lack a disc. These species include some (but not all) baleen  
80 whales [22], giant ant eaters and sloths [23].

81 In order to address this uncertainty, we have examined the development of the TMJ in  
82 monotremes and made comparison with mouse developmental models where muscle  
83 development is perturbed.

84

## 85 **Materials and Methods**

86 Platypus (*Ornithorhynchus anatinus*) and short-beaked echidna (*Tachyglossus aculeatus*)  
87 slides were imaged from the collections at the Cambridge University Museum of Zoology.  
88 Details of samples imaged are in table 1. All museum samples have been studied in  
89 previously published works [21,24,25]. Stages for platypus are after Ashwell [26]. Staging of  
90 echidna H.SP EC5 is estimated by cross-referencing previous studies [19,27]. CT cans of  
91 adult platypus were a gift of Anjali Goswami, the Natural History Museum, London.

92 *Mesp1Cre;Tbx1flox* (*Tbx1CKO*) mice were derived as previously described [28].

93 Tissue processing and histological staining: embryonic samples for histological sectioning  
94 were fixed overnight at 4 °C in 4 % paraformaldehyde (PFA), before being dehydrated  
95 through a graded series of ethanol and stored at -20°C. For tissue processing, samples were  
96 cleared with HistoClear II, before wax infiltration with paraffin wax at 60°C. Wax embedded  
97 samples were microtome sectioned at 8 µm thickness, then mounted in parallel series on  
98 charged slides.

99 For histological examination of bone and cartilage, the slides were then stained with  
100 picosirius red and alcian blue trichrome stain using standard techniques.

101

| Species                         | Collection | ID               | Estimated Stage | CRL   |
|---------------------------------|------------|------------------|-----------------|-------|
| <i>Ornithorhynchus anatinus</i> | Cambridge  | Specimen X       | P6.5*           | 33mm  |
| <i>Ornithorhynchus anatinus</i> | Cambridge  | Specimen Delta   | P10*            | 80mm  |
| <i>Ornithorhynchus anatinus</i> | Cambridge  | Specimen Beta    | P80*            | 250mm |
| <i>Tachyglossus aculeatus</i>   | Cambridge  | Echidna H.SP EC5 | P18†            | 83mm  |

102 Table 1: Museum held specimens used in the current study. CRL – Crown rump length. \*Estimate based on Ashwell, 2012.

103 †Estimate based on Griffiths, 1978 and Rismiller & McKelvey, 2003.

104

## 105 **Results**

106 If the TMJ disc is a therian novelty then no evidence of a disc would be expected in extant  
107 monotremes during development of the TMJ. The development of the jaw joint was therefore  
108 examined in museum held histological sections of developing post-hatching platypus and  
109 compared with the mouse.

110

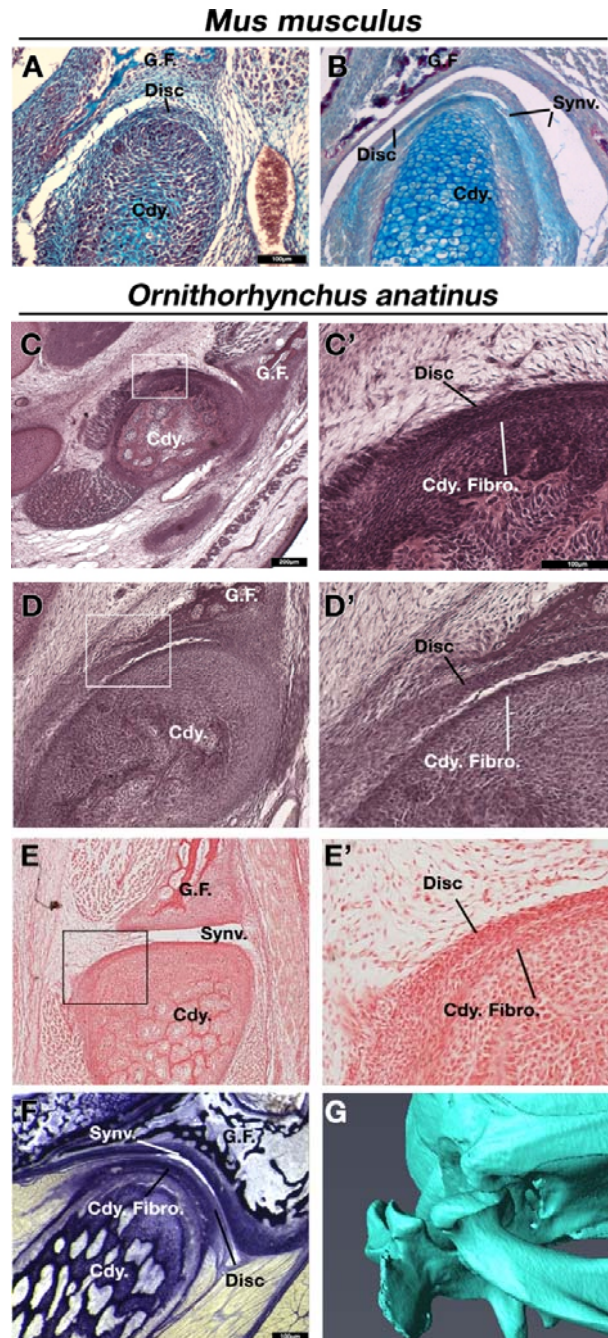

111  
112  
113  
114  
115  
116  
117  
118  
119

Figure 1 Comparison of mouse (*Mus musculus*) and platypus (*Ornithorhynchus anatinus*) developing jaw joint reveals the presence of a jaw joint disc anlage in early post-hatching platypus despite absence of the disc in adults. A,B Histological sections of mouse jaw joint disc development at embryonic day 16.5 (A) and postnatal day 0 (B). C-D' Histological sections of estimated post hatching day 6.5 jaw joint at two different levels (C and D) Note that the separation between the disc anlage and condylar in D is probably a processing artefact. E,E'' Histological sections of estimated post hatching day 10 jaw joint. F Histological section of mature jaw joint in a juvenile platypus are estimated post hatching day 80. G  $\mu$ CT scan of jaw joint region of adult platypus. G.F. – glenoid fossa; Cdy. – condylar process; Cdy. Fibro. – condylar fibrocartilage; Synv. – synovial cavity of the jaw joint.

120  
121  
122  
123  
124

As other authors have previously described [12,29], in the embryonic day (E) 16.5 mouse, the disc anlage is observed as thickened later of mesenchyme connected to the superior aspect of the condylar cartilage (Figure 1A). At postnatal day (P) 0, the disc has separated from the condylar and sits within the synovial cavity of the jaw joint (Figure 1B). In a platypus sample estimated to be 6.5 days post hatching, the TMJ had been initiated, but the joint cavity had not

125 yet formed (Figure 1C,D). Close examination of the superior surface of the condylar cartilage  
126 revealed a double layer of thickened mesenchyme in the future fibrocartilage layer of the  
127 condylar (Figure 1 C',D'). The outer layer is similar to that known to develop into the  
128 articular disc in therian mammals [12]. This thickened mesenchyme persisted in older  
129 samples, estimated to be P10, where the synovial cavity of the TMJ was beginning to form  
130 above (Figure 1 E,E'). In the most mature platypus sample examined (around P80) the  
131 fibrocartilage layer of the condylar process was thick and had a double-layered structure  
132 (Figure 1F). The outer layer was connected via a tendon to the lateral pterygoid muscle. At  
133 this late stage of postnatal development, the platypus puggle would have been expected to  
134 start leaving the burrow and to be eating a mixed diet, although full weaning does not occur  
135 until around 205 days post hatching [27]. In the mature platypus, the condylar process sits  
136 within a glenoid fossa (Figure 1 F,G), which was not fully formed at earlier stages. A disc-  
137 like structure lying over the condylar and connected to the adjacent muscles was therefore  
138 evident in the platypus postnatally but did not lift off the condylar at any stage.  
139

140 Next we examined the development of the TMJ in a derived young short-beaked echidna  
141 puggle specimen with a crown-rump length of 83mm, which we estimate to be around P18.  
142 The TMJ is not fully (Figure 2). The condylar process possessed a thick, doubled  
143 fibrocartilage outer layer (figure 2), much as was observed in the platypus (Figure 1D). The  
144 outer fibrocartilage later was connected by connective tissue to the lateral pterygoid muscle  
145 (figure 2B'). Clear disc-like structures were therefore present during development in both  
146 extant monotremes.  
147

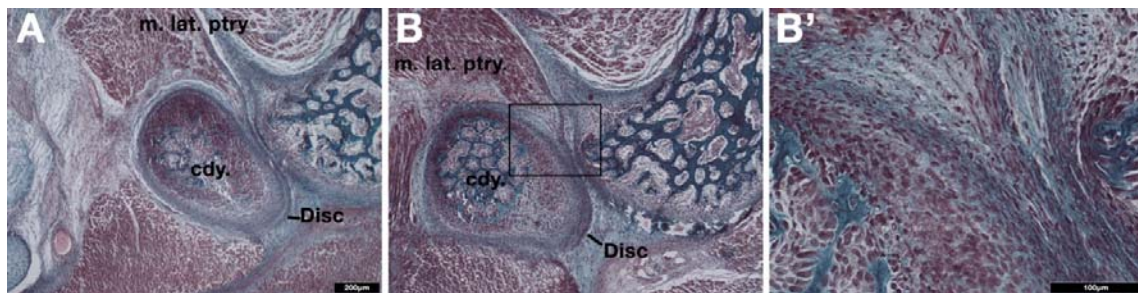

148  
149 **Figure 2** Examination of the developing jaw joint reveals the presence of a jaw joint disc anlage in post-hatching day 18  
150 short-beaked echidna (*Tachyglossus aculeatus*). A-B Histological staining at the forming jaw articulation in echidna young  
151 estimated to be 18 days post hatching at two different level. Fibrocartilage disc anlage superior to the condylar and  
152 connected by tendon lateral pterygoid muscle is observed. B' High-powered view of boxed region in B showing the  
153 connection between the muscle and the developing disc. Cdy. – condylar process; m. lat. ptry. – lateral pterygoid muscle.

154  
155 Taken together, the developmental evidence suggests that extant monotremes initiate a layer  
156 of fibrocartilage connected to the lateral pterygoid muscle, similar to the initiation of the TMJ  
157 disc in therian mammals. However, unlike in therian mammals, the monotreme fibrocartilage  
158 failed to separate from the condylar to form an articular disc in the TMJ. Interactions with  
159 musculature, both mechanical [13,30–32] and molecular [12,13,15,33–37], have been  
160 suggested to be responsible for the proper formation of the TMJ disc. Lack of mechanical  
161 force in monotremes might therefore result in the disc remaining attached to the condylar. In  
162 order to examine how changes in mechanical loading affect disc development, we next  
163 examined disc development in the *Mesp1Cre;Tbx1flox* conditional mutant mouse  
164 (*Tbx1CKO*). This mouse has a mesoderm specific deletion of the T-box transcription factor  
165 *Tbx1*, resulting in hypomorphic muscle development [28,38,39].  
166

167 We used alcian blue / alizarin red stained histological sections to investigate the development  
168 of the TMJ disc in *TbxCKO* mice at embryonic day 15.5. This is the stage when future disc  
169 mesenchyme is first observed (see Figure 1A). In wildtype embryos, the future disc  
170 mesenchyme was observed as a condensation attached to the superior surface of the condylar  
171 fibrocartilage (Figure 3A). A distinct disc-like mesenchyme was also observed superior to the  
172 condylar of the *Tbx1CKO* (Figure 3B). This mesenchyme and the fibrocartilage layer of the  
173 condylar cartilage both appeared thicker in the *Tbx1CKO* compared to its wildtype littermate.  
174 At E18.5, the wildtype TMJ disc had separated from the condylar process, and sat within a  
175 synovial joint cavity (Figure 3C). In the *Tbx1CKO* an upper synovial cavity had formed,  
176 similar to the WT, but the disc had failed to separate from the condylar (Figure 3D). Instead, a  
177 thickened band of fibrocartilage was observed on the superior surface of the condylar process.  
178  
179

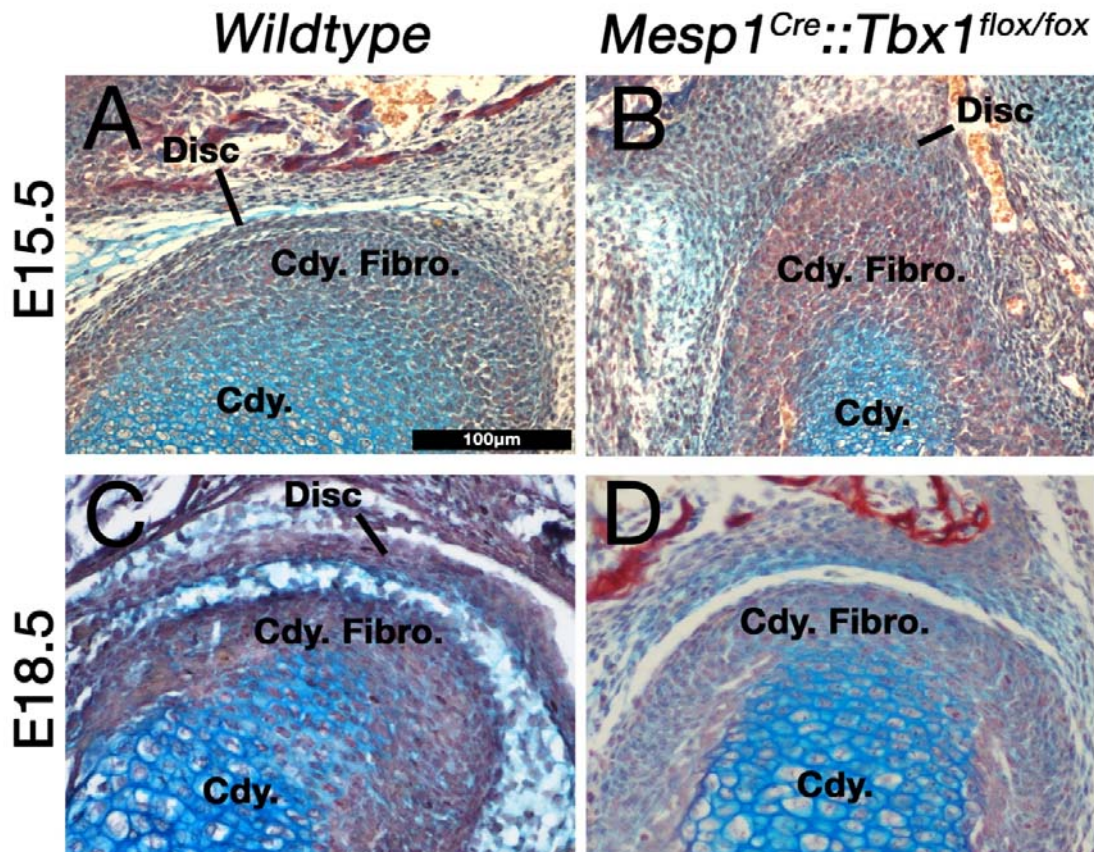

180  
181 **Figure 3** Figure 4 Muscle-disc interactions are required for the maturation and separation of the jaw joint articular disc.  
182 A,B The disc anlage is observed at E15.5 in both wildtype mice (A) and *Mesp1Cre;Tbx1<sup>fl/fl</sup>* mice with a hypomorphic muscle  
183 phenotype (B). C,D By E18.5 the disc has separated from the condylar process in wildtype mice (C), but not in and  
184 *Mesp1Cre;Tbx1<sup>fl/fl</sup>* mice. Cdy. – condylar process; Cdy. Fibro. – condylar fibrocartilage

185

186

## 187 **Discussion**

188 The absence of an articular disc in monotremes has been thought to be either a secondary loss  
189 related to the absence of mature dentition, or the disc being a later acquisition in the therian  
190 clade. The data presented here show that a mesenchyme similar to the TMJ disc is initiated in  
191 both platypus and echidna jaws during post-hatching development, but fails to mature and  
192 separated from the dentary condyle. In the light of the failure of the disc to fully separate in  
193 transgenic mouse models with hypomorphic muscle development, it seems likely that the disc  
194 has been secondarily lost in edentulous mammals, including monotremes.

195

196 The secondary jaw joint of some of the earliest mammals-like reptiles with a mandibular  
197 middle ear, such as *Morganuconodon*, were able to withstand the biomechanical stresses  
198 sufficient for feeding on the hard keratinised bodies of insects, while others such as  
199 *Kuehneotherium* could not [40]. Later animals developed a range of mandibular movements  
200 during chewing, including rolling, yaw and front to back movements [18,41–45]. It is not  
201 clear if these species had evolved an articular disc, since fibrocartilage is rarely fossilised.  
202 Based on the presence of the first stages of disc formation during monotreme development it  
203 is likely that the common stem Jurassic mammal-like reptilian ancestor of both monotremes  
204 and therian mammals had a disc. The data presented here confirms an essential biomechanical  
205 component in disc development. Therefore, we are able to consider when during mammalian  
206 evolution these forces were able to act to enable disc formation. For example, it is probable  
207 that many late Triassic and early Jurassic mammaliaforms such as *Hadrocodium* [46]  
208 possessed an articular disc, since they possessed a well formed squamosal dentary joint and  
209 occluding teeth capable of chewing.

210

211 One hypothesis for the origin of the articular disc is that it formed from the tendon of a  
212 muscle of jaw closure of the primary jaw joint interrupted by the formation of the novel  
213 mammalian jaw joint [11]. The tendons and skeleton of the front of the head are derived from  
214 the cranial neural crest, whereas much of the musculature is mesoderm derived [47,48].  
215 Interactions between the mesoderm and neural crest co-ordinate the muscular skeletal  
216 development of the head [49]. A striking piece of evidence for the tendon origin of the disc is  
217 the expression in the developing articular disc of *Scleraxis* [13,50], a specific regulator of  
218 tendon and ligament development [51,52]. If the disc is derived from a tendon, then it may be  
219 thought of as a fibrocartilage sesamoid. Such sesamoids are found in joints and in tendons  
220 that are subject to compression, like the tendons that pass around bony pulleys such as the  
221 flexor digitorum profundus tendon in quadrupeds, the patella tendon and ligament [53], and  
222 the cartilago transiliens in crocodylians [54]. Fibrocartilages also form at the entheses of long  
223 bones. Interestingly, it has been demonstrated that much like the TMJ disc, entheses  
224 fibrocartilage cells are derived from Hh responsive cells and that these cells are responsive to  
225 mechanical loading [55]. To support the tendon origin of the TMJ disc, our data show that the  
226 formation of the disc is dependent on interactions between the skeletal and muscle  
227 components of the TMJ. Such tissue interaction is also a key process in the formation of  
228 tendons and ligaments [56,57].

229

230 The mechanism by which the disc fails to separate from the condylar in monotremes is not yet  
231 clear. Hh signalling is known to be involved in both the initiation of the disc, and the later  
232 separation from the condylar [12]. It is still possible that the role in Hh in separation of the  
233 disc is a therian innovation, and as such the reason that monotremes fail to do so is a lack of  
234 the later Hh dependent developmental programme for disc separation. However, the absence  
235 of the disc in therian edentates strongly suggests that the loss is secondary. Furthermore, the



236 failure of the disc to elevate off the condylar in *Tbx1CKO*, with hypomorphic cranial  
237 musculature, suggests that the loss of discs in edentulous mammals is due to changes in the  
238 developmental biomechanics of the muscle/bone interactions that occurred as a consequence  
239 of loss of teeth, such as a reduction in size and power of the muscles of mastication. The  
240 formation and maturation of the disc is unlikely to be directly dependent on the presence of  
241 teeth. The TMJ disc forms normally during embryonic development in mice quite some time  
242 before the eruption of the teeth during the third postnatal week, while baleen whales vary in  
243 the presence or absence of TMJ discs, and indeed TMJ synovial cavities [22]. In addition, it is  
244 clear that movement of the jaw is essential for maturation of the disc (see also [31]).  
245 Unfortunately, due to the rarity of fresh material, it is not possible to further examine the  
246 mechanistic aspects of TMJ development in edentulous monotreme species at the present  
247 time.

248  
249 In conclusion, we demonstrate that during development, monotremes show evidence of  
250 initiation of the fibrocartilage articular disc, despite all adult monotremes not having an  
251 articular TMJ disc. The maturation and separation of the disc is dependent on biomechanical  
252 interactions with the associated musculature, as demonstrated by the failure of disc maturation  
253 and separation in mice mutants with hypomorphic cranial muscle. Therefore, toothed  
254 ancestors of monotremes likely had a TMJ disc. Our research suggests that changes in the  
255 cranial musculature that occurred as a consequence of a move towards edentulous dietary  
256 niches resulted in absence of the TMJ in monotremes, a parallel loss occurring in edentulous  
257 therian mammals (Figure 4). Finally, the presence of the disc anlage in monotremes indicates  
258 that the mammal-like reptile ancestors of all modern mammals likely possessed a disc to  
259 cushion the novel jaw articulation.  
260

### Dentary formation      Disc initiation      Disc Maturation

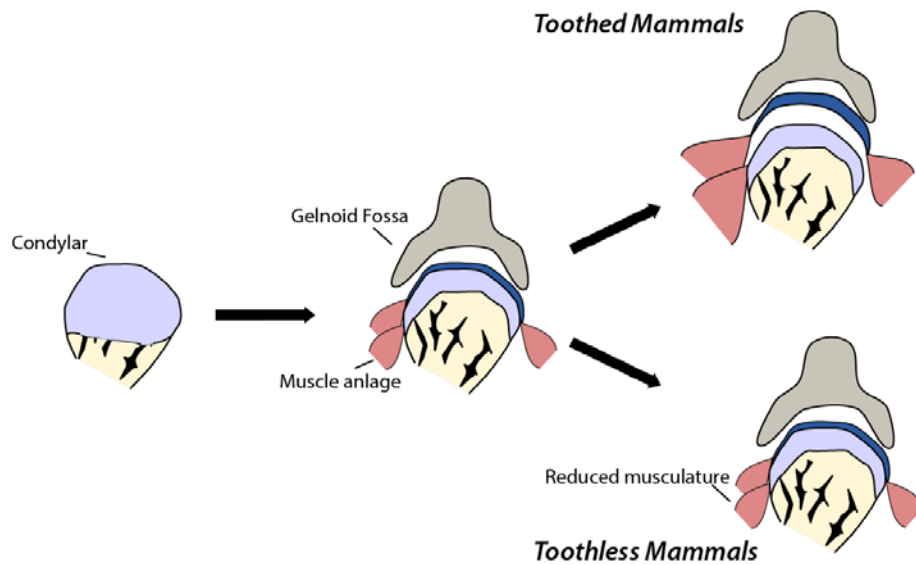

261  
262 *Figure 5 Maturation of the jaw joint articular disc in mammals is dependent on muscle interactions. In toothless mammals,*  
263 *reduction in jaw musculature results in changes in muscle-disc interaction and so the disc does not separate from the*  
264 *mandibular condyle to sit within the synovial joint capsule.*

### 265 Acknowledgments

266 We would like to thank and acknowledge the following people. Anjali Goswami provided  
267  $\mu$ CT images of the adult platypus. Robert Asher provided access to samples held at the  
268 Zoological Museum in Cambridge University. Peter Giere provided access to the Hill

269 Collection at the Berlin Museum für Naturkunde. Andrew Gillis provided assistance with  
270 imaging.

271

## 272 **Funding**

273 This work was supported by the Wellcome Trust (102889/Z/13/Z).

274

## 275 **Bibliography**

276

277 1. Wang Y *et al.* 2011 Tissue interaction is required for glenoid fossa development during  
278 temporomandibular joint formation. *Dev. Dyn.* **240**, 2466–2473.  
279 (doi:10.1002/dvdy.22748)

280 2. Wilson J, Tucker AS. 2004 Fgf and Bmp signals repress the expression of Bapx1 in the  
281 mandibular mesenchyme and control the position of the developing jaw joint. *Dev.*  
282 *Biol.* **266**, 138–150. (doi:10.1016/j.ydbio.2003.10.012)

283 3. Anthwal N, Joshi L, Tucker AS. 2013 Evolution of the mammalian middle ear and jaw:  
284 adaptations and novel structures. *J. Anat.* **222**, 147–60. (doi:10.1111/j.1469-  
285 7580.2012.01526.x)

286 4. Takechi M, Kuratani S. 2010 History of studies on mammalian middle ear evolution: a  
287 comparative morphological and developmental biology perspective. *J. Exp. Zool. B.*  
288 *Mol. Dev. Evol.* **314**, 417–33. (doi:10.1002/jez.b.21347)

289 5. Maier W, Ruf I. 2016 Evolution of the mammalian middle ear: a historical review. *J.*  
290 *Anat.* **228**, 270–83. (doi:10.1111/joa.12379)

291 6. Tucker AS. 2017 Major evolutionary transitions and innovations: the tympanic middle  
292 ear. *Philos. Trans. R. Soc. B Biol. Sci.* **372**, 20150483. (doi:10.1098/rstb.2015.0483)

293 7. Urban DJ, Anthwal N, Luo Z-X, Maier JA, Sadier A, Tucker AS, Sears KE. 2017 A new  
294 developmental mechanism for the separation of the mammalian middle ear ossicles  
295 from the jaw. *Proc. R. Soc. B Biol. Sci.* **284**, 20162416. (doi:10.1098/rspb.2016.2416)

296 8. Anthwal N, Urban DJ, Luo Z-X, Sears KE, Tucker AS. 2017 Meckel's cartilage  
297 breakdown offers clues to mammalian middle ear evolution. *Nat. Ecol. Evol.* **1**, 0093.  
298 (doi:10.1038/s41559-017-0093)

299 9. Luo Z-X. 2011 Developmental Patterns in Mesozoic Evolution of Mammal Ears. *Annu.*  
300 *Rev. Ecol. Evol. Syst.* **42**, 355–380. (doi:10.1146/annurev-ecolsys-032511-142302)

301 10. Wang H, Meng J, Wang Y. 2019 Cretaceous fossil reveals a new pattern in mammalian  
302 middle ear evolution. *Nature*, 1–4. (doi:10.1038/s41586-019-1792-0)

303 11. Herring SW. 2003 TMJ anatomy and animals models. *J. Musculoskelet Neuronal*  
304 *Interact.* **3**, 997–1003. (doi:10.1016/j.biotechadv.2011.08.021.Secreted)

305 12. Purcell P, Joo BW, Hu JK, Tran P V, Calicchio ML, O'Connell DJ, Maas RL, Tabin CJ. 2009  
306 Temporomandibular joint formation requires two distinct hedgehog-dependent steps.  
307 *Proc. Natl. Acad. Sci. U. S. A.* **106**, 18297–302. (doi:10.1073/pnas.0908836106)

308 13. Purcell P *et al.* 2012 Spry1 and spry2 are essential for development of the  
309 temporomandibular joint. *J. Dent. Res.* **91**, 387–93. (doi:10.1177/0022034512438401)

310 14. Hinton RJ, Jing J, Feng JQ. 2015 Genetic Influences on Temporomandibular Joint  
311 Development and Growth. *Craniofacial Dev.* **115**, 85–109.  
312 (doi:10.1016/bs.ctdb.2015.07.008)

313 15. Shibukawa Y, Young B, Wu C, Yamada S, Long F, Pacifici M, Koyama E. 2007  
314 Temporomandibular joint formation and condyle growth require Indian hedgehog  
315 signaling. *Dev. Dyn.* **236**, 426–34. (doi:10.1002/dvdy.21036)

316 16. Yang L, Gu S, Ye W, Song Y, Chen YP. 2016 Augmented Indian hedgehog signaling in

- 317 cranial neural crest cells leads to craniofacial abnormalities and dysplastic  
318 temporomandibular joint in mice. *Cell Tissue Res.* **364**, 105–115. (doi:10.1007/s00441-  
319 015-2306-5)
- 320 17. Sprinz R. 1964 A Note On The Mandibular Intra-Articular Disc In The Joints Of  
321 Marsupialia And Monotremata. *Proc. Zool. Soc. London* **144**, 327–337.  
322 (doi:10.1088/1751-8113/44/8/085201)
- 323 18. Kemp TS. 2005 *The Origin and Evolution of Mammals*. Oxford, UK: Oxford University  
324 Press.
- 325 19. Griffiths M. 1978 *The Biology of the Monotremes*. London: Academic Press.
- 326 20. Asahara M, Koizumi M, Macrini TE, Hand SJ, Archer M. 2016 Comparative cranial  
327 morphology in living and extinct platypuses: Feeding behavior, electroreception, and  
328 loss of teeth. *Sci. Adv.* **2**. (doi:10.1126/sciadv.1601329)
- 329 21. Green HLHH. 1937 VIII—The development and morphology of the teeth of  
330 Ornithorhynchus \*. *Philos. Trans. R. Soc. Lond. B. Biol. Sci.* **228**, 367–420.  
331 (doi:10.1098/rstb.1937.0015)
- 332 22. El Adli JJ, Deméré TA. 2015 On the Anatomy of the Temporomandibular Joint and the  
333 Muscles That Act Upon It: Observations on the Gray Whale, *Eschrichtius robustus*.  
334 *Anat. Rec.* **298**, 680–690. (doi:10.1002/ar.23109)
- 335 23. Naples VL. 1999 Morphology, evolution and function of feeding in the giant anteater  
336 (*Myrmecophaga tridactyla*). *J. Zool.* **249**, 19–41. (doi:10.1017/S0952836999009036)
- 337 24. Watson DMS. 1916 The Monotreme Skull: A Contribution to Mammalian  
338 Morphogenesis. *Philos. Trans. R. Soc. London. Ser. B, Contain. Pap. a Biol. Character*  
339 **207**, 311–374. (doi:10.2307/92025)
- 340 25. Presley R, Steel FLD. 1978 The pterygoid and ectopterygoid in mammals. *Anat.*  
341 *Embryol. (Berl)*. **154**, 95–110. (doi:10.1007/BF00317957)
- 342 26. Ashwell KWS. 2012 Development of the hypothalamus and pituitary in platypus  
343 (*Ornithorhynchus anatinus*) and short-beaked echidna (*Tachyglossus aculeatus*). *J.*  
344 *Anat.* **221**, 9–20. (doi:10.1111/j.1469-7580.2012.01508.x)
- 345 27. Rismiller PD, McKelvey MW. 2003 Body mass, age and sexual maturity in short-  
346 beaked echidnas, *Tachyglossus aculeatus*. *Comp. Biochem. Physiol. Part A Mol. Integr.*  
347 *Physiol.* **136**, 851–865. (doi:10.1016/S1095-6433(03)00225-3)
- 348 28. Anthwal N, Peters H, Tucker AS. 2015 Species-specific modifications of mandible  
349 shape reveal independent mechanisms for growth and initiation of the coronoid.  
350 *Evodevo* **6**, 35. (doi:10.1186/s13227-015-0030-6)
- 351 29. Hinton RJ. 2014 Genes that regulate morphogenesis and growth of the  
352 temporomandibular joint: A review. *Dev. Dyn.* **243**, 864–74. (doi:10.1002/dvdy.24130)
- 353 30. Nickel JC, Iwasaki LR, Gonzalez YM, Gallo LM, Yao H. 2018 Mechanobehavior and  
354 Ontogenesis of the Temporomandibular Joint. *J. Dent. Res.* **97**, 1185–1192.  
355 (doi:10.1177/0022034518786469)
- 356 31. Habib H, Hatta T, Rahman OIF, Yoshimura Y, Otani H. 2007 Fetal jaw movement  
357 affects development of articular disk in the temporomandibular joint. *Congenit.*  
358 *Anom. (Kyoto)*. **47**, 53–57. (doi:10.1111/j.1741-4520.2007.00143.x)
- 359 32. Jahan E, Matsumoto A, Rafiq AM, Hashimoto R, Inoue T, Udagawa J, Sekine J, Otani H.  
360 2014 Fetal jaw movement affects *Ihh* signaling in mandibular condylar cartilage  
361 development: the possible role of *Ihh* as mechanotransduction mediator. *Arch. Oral*  
362 *Biol.* **59**, 1108–18. (doi:10.1016/j.archoralbio.2014.06.009)
- 363 33. Kubiak M, Ditzel M, Kubiak M, Ditzel M. 2016 A Joint Less Ordinary: Intriguing Roles

- 364 for Hedgehog Signalling in the Development of the Temporomandibular Synovial  
365 Joint. *J. Dev. Biol.* **4**, 25. (doi:10.3390/jdb4030025)
- 366 34. Yasuda T, Nah HD, Laurita J, Kinumatsu T, Shibukawa Y, Shibutani T, Minugh-Purvis N,  
367 Pacifici M, Koyama E. 2012 Muenke Syndrome Mutation, FgfR3 P244R , Causes TMJ  
368 Defects. *J. Dent. Res.* **91**, 683–689. (doi:10.1177/0022034512449170)
- 369 35. Gu S, Wei N, Yu L, Fei J, Chen Y. 2008 Shox2-deficiency leads to dysplasia and ankylosis  
370 of the temporomandibular joint in mice. *Mech. Dev.* **125**, 729–42.  
371 (doi:10.1016/j.mod.2008.04.003)
- 372 36. Michikami I *et al.* 2012 Trps1 is necessary for normal temporomandibular joint  
373 development. *Cell Tissue Res.* **348**, 131–40. (doi:10.1007/s00441-012-1372-1)
- 374 37. Kinumatsu T, Shibukawa Y, Yasuda T, Nagayama M, Yamada S, Serra R, Pacifici M,  
375 Koyama E. 2011 TMJ development and growth require primary cilia function. *J. Dent.*  
376 *Res.* **90**, 988–94. (doi:10.1177/0022034511409407)
- 377 38. Aggarwal VS, Carpenter C, Freyer L, Liao J, Petti M, Morrow BE. 2010 Mesodermal  
378 Tbx1 is required for patterning the proximal mandible in mice. *Dev. Biol.* **344**, 669–  
379 681. (doi:10.1016/j.ydbio.2010.05.496)
- 380 39. Grifone R, Jarry T, Dandonneau M, Grenier J, Duprez D, Kelly RG. 2008 Properties of  
381 branchiomic and somite-derived muscle development in Tbx1 mutant embryos.  
382 *Dev. Dyn.* **237**, 3071–8. (doi:10.1002/dvdy.21718)
- 383 40. Gill PG, Purnell MA, Crumpton N, Brown KR, Gostling NJ, Stampanoni M, Rayfield EJ.  
384 2014 Dietary specializations and diversity in feeding ecology of the earliest stem  
385 mammals. *Nature* **512**, 303–305. (doi:10.1038/nature13622)
- 386 41. Bhullar B-AS, Manafzadeh AR, Miyamae JA, Hoffman EA, Brainerd EL, Musinsky C,  
387 Crumpton AW. 2019 Rolling of the jaw is essential for mammalian chewing and  
388 tribosphenic molar function. *Nature* **566**, 528–532. (doi:10.1038/s41586-019-0940-x)
- 389 42. Grossnickle DM. 2017 The evolutionary origin of jaw yaw in mammals. *Sci. Rep.* **7**,  
390 45094. (doi:10.1038/srep45094)
- 391 43. Luo Z-X, Gatesy SM, Jenkins FA, Amaral WW, Shubin NH. 2015 Mandibular and dental  
392 characteristics of Late Triassic mammaliaform Haramiyavia and their ramifications for  
393 basal mammal evolution. *Proc. Natl. Acad. Sci.* **112**, E7101–E7109.  
394 (doi:10.1073/pnas.1519387112)
- 395 44. Lautenschlager S, Gill P, Luo Z-X, Fagan MJ, Rayfield EJ. 2017 Morphological evolution  
396 of the mammalian jaw adductor complex. *Biol. Rev.* **92**, 1910–1940.  
397 (doi:10.1111/brv.12314)
- 398 45. Lautenschlager S, Gill PG, Luo Z-X, Fagan MJ, Rayfield EJ. 2018 The role of  
399 miniaturization in the evolution of the mammalian jaw and middle ear. *Nature* **561**,  
400 533–537. (doi:10.1038/s41586-018-0521-4)
- 401 46. Luo Z-X. 2001 A New Mammaliaform from the Early Jurassic and Evolution of  
402 Mammalian Characteristics. *Science (80-. )*. **292**, 1535–1540.  
403 (doi:10.1126/science.1058476)
- 404 47. Yoshida T, Vivatbutsiri P, Morriss-Kay G, Saga Y, Iseki S. 2008 Cell lineage in  
405 mammalian craniofacial mesenchyme. *Mech. Dev.* **125**, 797–808.  
406 (doi:10.1016/j.mod.2008.06.007)
- 407 48. Santagati F, Rijli FM. 2003 Cranial neural crest and the building of the vertebrate head.  
408 *Nat. Rev. Neurosci.* **4**, 806–818. (doi:10.1038/nrn1221)
- 409 49. Grenier J, Teillet M-A, Grifone R, Kelly RG, Duprez D. 2009 Relationship between  
410 neural crest cells and cranial mesoderm during head muscle development. *PLoS One*

- 411 **4**, e4381. (doi:10.1371/journal.pone.0004381)
- 412 50. Roberts RR, Bobzin L, Teng CS, Pal D, Tuzon CT, Schweitzer R, Merrill AE. 2019 FGF  
413 signaling patterns cell fate at the interface between tendon and bone. *Development*  
414 **146**, dev170241. (doi:10.1242/dev.170241)
- 415 51. Schweitzer R, Chyung JH, Murtaugh LC, Brent AE, Rosen V, Olson EN, Lassar A, Tabin  
416 CJ. 2001 Analysis of the tendon cell fate using Scleraxis, a specific marker for tendons  
417 and ligaments. *Development* **128**, 3855–66.
- 418 52. Sugimoto Y, Takimoto A, Hiraki Y, Shukunami C. 2013 Generation and characterization  
419 of *ScxCre* transgenic mice. *genesis* **51**, 275–283. (doi:10.1002/dvg.22372)
- 420 53. Benjamin M, Ralphs JR. 1998 Fibrocartilage in tendons and ligaments--an adaptation  
421 to compressive load. *J. Anat.* **193 ( Pt 4)**, 481–94.
- 422 54. Tsai HP, Holliday CM. 2011 Ontogeny of the Alligator Cartilago Transiliens and Its  
423 Significance for Sauropsid Jaw Muscle Evolution. *PLoS One* **6**, e24935.  
424 (doi:10.1371/journal.pone.0024935)
- 425 55. Schwartz AG, Long F, Thomopoulos S. 2015 Enthesis fibrocartilage cells originate from  
426 a population of Hedgehog-responsive cells modulated by the loading environment.  
427 *Development* **142**, 196–206. (doi:10.1242/dev.112714)
- 428 56. Huang AH. 2017 Coordinated development of the limb musculoskeletal system:  
429 Tendon and muscle patterning and integration with the skeleton. *Dev. Biol.* **429**, 420–  
430 428. (doi:https://doi.org/10.1016/j.ydbio.2017.03.028)
- 431 57. Eloy-Trinquet S, Wang H, Edom-Vovard F, Duprez D. 2009 Fgf signaling components  
432 are associated with muscles and tendons during limb development. *Dev. Dyn.* **238**,  
433 1195–206. (doi:10.1002/dvdy.21946)
- 434
